# Supplementary material
Source: PubMed Central journal article supplement (PMC6686672)

eTable 1. List of 497 SNPs selected from the NHANES III genetic dataset for this study

| <b>Gene Symbol<sup>a</sup></b> | <b>dbSNP rs#<sup>b</sup></b> | <b>SNP position</b> | <b>Alleles</b> | <b>Function</b>                        |
|--------------------------------|------------------------------|---------------------|----------------|----------------------------------------|
| <i>AASS</i>                    | rs4140745                    | chr7:121754695      | C/T            | Intron                                 |
| <i>ABCA1</i>                   | rs1883025                    | chr9:107664301      | A/G            | Intron                                 |
| <i>ABCA1</i>                   | rs2000069                    | chr9:107635869      | C/T            | Intron                                 |
| <i>ABCA1</i>                   | rs3890182                    | chr9:107647654      | A/G            | Intron                                 |
| <i>ABCA1</i>                   | rs3905000                    | chr9:107657070      | A/G            | Intron                                 |
| <i>ABCA1</i>                   | rs4149268                    | chr9:107647220      | A/G            | Intron                                 |
| <i>ABCA5</i>                   | rs11650955                   | chr17:67235705      | A/G            | Intron                                 |
| <i>ABCB1</i>                   | rs1045642                    | chr7:87138645       | A/C/G/T        | Coding-synon                           |
| <i>ABCB11</i>                  | rs552976                     | chr2:169791438      | C/T            | Intron                                 |
| <i>ABCG2</i>                   | rs2231142                    | chr4:89052323       | A/C            | Missense                               |
| <i>ABCG4</i>                   | rs626776                     | chr11:119028813     | C/G            | Intron                                 |
| <i>ABCG5</i>                   | rs6756629                    | chr2:44065090       | A/G            | Near-gene-5,missense                   |
| <i>ABCG8</i>                   | rs6544713                    | chr2:44073881       | C/T            | Intron                                 |
| <i>ACE</i>                     | rs4646994                    | chr17:61565904      | D/I            | An Alu repetitive element in an intron |
| <i>ADCY5</i>                   | rs11708067                   | chr3:123065778      | A/G            | Intron                                 |
| <i>ADCY5</i>                   | rs2877716                    | chr3:123094451      | C/T            | Intron                                 |
| <i>ADH1B</i>                   | rs1229984                    | chr4:100239319      | A/G            | Missense                               |
| <i>ADH1B</i>                   | rs17033                      | chr4:100228945      | A/G            | Untranslated-3                         |
| <i>ADH1B</i>                   | rs2066702                    | chr4:100229017      | C/T            | Missense                               |
| <i>ADH1C</i>                   | rs1693482                    | chr4:100263965      | C/T            | Missense                               |
| <i>ADH1C</i>                   | rs698                        | chr4:100260789      | A/G/T          | Missense                               |
| <i>ADIPOQ</i>                  | rs6773957                    | chr3:186573705      | A/G            | Ncrna,untranslated-3                   |
| <i>ADRB1</i>                   | rs1801252                    | chr10:115804036     | A/G            | Missense                               |
| <i>ADRB2</i>                   | rs1042713                    | chr5:148206440      | A/G            | Missense                               |
| <i>ADRB2</i>                   | rs1042714                    | chr5:148206473      | C/G            | Missense                               |
| <i>ADRB3</i>                   | rs4994                       | chr8:37823798       | A/C/G/T        | Missense                               |
| <i>AFF1</i>                    | rs342456                     | chr4:88023870       | C/T            | Intron                                 |
| <i>AFF1</i>                    | rs3775214                    | chr4:88023299       | C/T            | Intron                                 |
| <i>APOA1</i>                   | rs11216153                   | chr11:116705100     | G/T            | Unknown                                |
| <i>APOA1</i>                   | rs12718463                   | chr11:116706343     | C/T            | Near-gene-3                            |
| <i>APOA1</i>                   | rs7116797                    | chr11:116707338     | A/G            | Intron                                 |
| <i>APOA4</i>                   | rs5090                       | chr11:116694055     | C/G            | Near-gene-5                            |
| <i>APOA4</i>                   | rs5092                       | chr11:116693464     | A/G            | Coding-synon                           |
| <i>APOA4</i>                   | rs5094                       | chr11:116693213     | A/G            | Intron                                 |
| <i>APOA4</i>                   | rs5096                       | chr11:116693095     | A/G            | Intron                                 |
| <i>APOA4</i>                   | rs5100                       | chr11:116692694     | A/G            | Intron                                 |
| <i>APOA4</i>                   | rs5104                       | chr11:116692334     | A/G            | Missense                               |
| <i>APOA4</i>                   | rs5110                       | chr11:116691634     | G/T            | Missense                               |
| <i>APOA4</i>                   | rs675                        | chr11:116691675     | A/T            | Missense                               |

|              |            |                 |         |                            |
|--------------|------------|-----------------|---------|----------------------------|
| <i>APOA5</i> | rs10750097 | chr11:116664040 | A/G     | Near-gene-5                |
| <i>APOA5</i> | rs12287066 | chr11:116662331 | A/C/G/T | Coding-synon               |
| <i>APOA5</i> | rs17120035 | chr11:116663851 | C/T     | Near-gene-5                |
| <i>APOA5</i> | rs2072560  | chr11:116661826 | C/T     | Intron                     |
| <i>APOA5</i> | rs2075294  | chr11:116658122 | G/T     | Intron                     |
| <i>APOA5</i> | rs3135506  | chr11:116662407 | C/G     | Missense                   |
| <i>APOA5</i> | rs33984246 | chr11:116660450 | C/T     | Near-gene-5,untranslated-3 |
| <i>APOA5</i> | rs34089864 | chr11:116660768 | C/T     | Untranslated-3             |
| <i>APOA5</i> | rs619054   | chr11:116660813 | C/T     | Untranslated-3             |
| <i>APOA5</i> | rs662799   | chr11:116663707 | A/G     | Near-gene-5                |
| <i>APOB</i>  | rs10205849 | chr2:21262190   | C/T     | Intron                     |
| <i>APOB</i>  | rs1042031  | chr2:21225753   | A/C/G/T | Missense                   |
| <i>APOB</i>  | rs1042034  | chr2:21225281   | A/C/G/T | Missense                   |
| <i>APOB</i>  | rs11676704 | chr2:21244358   | G/T     | Intron                     |
| <i>APOB</i>  | rs12713558 | chr2:21229039   | A/C/G/T | Coding-synon               |
| <i>APOB</i>  | rs12713600 | chr2:21230736   | C/T     | Coding-synon               |
| <i>APOB</i>  | rs12713675 | chr2:21232373   | A/C     | Missense                   |
| <i>APOB</i>  | rs12713956 | chr2:21241505   | C/T     | Intron                     |
| <i>APOB</i>  | rs12714102 | chr2:21246306   | C/G     | Intron                     |
| <i>APOB</i>  | rs12714192 | chr2:21249682   | A/C/G/T | Missense                   |
| <i>APOB</i>  | rs12714221 | chr2:21251800   | A/G     | Intron                     |
| <i>APOB</i>  | rs12714254 | chr2:21264937   | A/C     | Intron                     |
| <i>APOB</i>  | rs12720778 | chr2:21246207   | C/T     | Intron                     |
| <i>APOB</i>  | rs12720852 | chr2:21227528   | C/T     | Coding-synon               |
| <i>APOB</i>  | rs1367117  | chr2:21263900   | A/C/G/T | Missense                   |
| <i>APOB</i>  | rs1469513  | chr2:21259562   | C/T     | Intron                     |
| <i>APOB</i>  | rs1800479  | chr2:21227383   | C/G     | Intron                     |
| <i>APOB</i>  | rs1801699  | chr2:21233999   | A/G     | Missense                   |
| <i>APOB</i>  | rs1801700  | chr2:21245813   | A/C/G/T | Coding-synon               |
| <i>APOB</i>  | rs1801701  | chr2:21228827   | A/C/G/T | Missense                   |
| <i>APOB</i>  | rs1801702  | chr2:21225485   | C/G     | Missense                   |
| <i>APOB</i>  | rs2854725  | chr2:21237786   | A/C     | Intron                     |
| <i>APOB</i>  | rs3791980  | chr2:21245329   | G/T     | Intron                     |
| <i>APOB</i>  | rs512535   | chr2:21267782   | A/G     | Intron,near-gene-5         |
| <i>APOB</i>  | rs531819   | chr2:21263639   | G/T     | Intron                     |
| <i>APOB</i>  | rs550619   | chr2:21260601   | A/G     | Intron                     |
| <i>APOB</i>  | rs617314   | chr2:21268219   | G/T     | Near-gene-5,ncrna          |
| <i>APOB</i>  | rs661665   | chr2:21265141   | G/T     | Intron                     |
| <i>APOB</i>  | rs673548   | chr2:21237544   | A/G     | Intron                     |
| <i>APOB</i>  | rs6752026  | chr2:21260934   | A/C/G/T | Missense                   |
| <i>APOB</i>  | rs679899   | chr2:21250914   | A/C/G/T | Missense                   |

|                  |            |                 |         |                                   |
|------------------|------------|-----------------|---------|-----------------------------------|
| <i>APOB</i>      | rs693      | chr2:21232195   | A/C/G/T | Coding-synon                      |
| <i>APOC1</i>     | rs4420638  | chr19:45422946  | A/G     | Near-gene-3                       |
| <i>APOC3</i>     | rs4520     | chr11:116701535 | C/T     | Coding-synon                      |
| <i>APOC3</i>     | rs5142     | chr11:116701850 | A/G     | Intron                            |
| <i>APOC3</i>     | rs734104   | chr11:116700860 | C/T     | Intron                            |
| <i>APOE</i>      | rs429358   | chr19:45411941  | C/T     | Missense                          |
| <i>APOE</i>      | rs7412     | chr19:45412079  | C/T     | Missense                          |
| <i>B4GALT4</i>   | rs12695382 | chr3:118948171  | A/G     | Intron                            |
| <i>B4GALT4</i>   | rs2001286  | chr3:118941235  | C/T     | Intron                            |
| <i>B9D2</i>      | rs1800468  | chr19:41860587  | A/G     | Intron,near-gene-5,untranslated-3 |
| <i>B9D2</i>      | rs1800469  | chr19:41860296  | C/T     | Intron,near-gene-3,near-gene-5    |
| <i>BAZ1B</i>     | rs714052   | chr7:72864869   | C/T     | Intron                            |
| <i>BRD3</i>      | rs457420   | chr9:136909261  | A/G     | Intron                            |
| <i>BUD13</i>     | rs28927680 | chr11:116619073 | C/G     | Untranslated-3                    |
| <i>C12orf27</i>  | rs1800574  | chr12:121416864 | C/T     | Missense,untranslated-5           |
| <i>C15orf42</i>  | rs8032553  | chr15:90137325  | A/G     | Intron                            |
| <i>C19orf59</i>  | rs10401670 | chr19:7742802   | C/T     | Intron                            |
| <i>C1orf124</i>  | rs2437150  | chr1:231488524  | A/G     | Intron,missense,untranslated-3    |
| <i>C20orf196</i> | rs6053754  | chr20:5842518   | C/T     | Intron                            |
| <i>CAPN10</i>    | rs3792267  | chr2:241531174  | A/G     | Intron                            |
| <i>CAPN10</i>    | rs3842570  | chr2:241534293  | D/I     | Intron                            |
| <i>CAPN10</i>    | rs5030952  | chr2:241542703  | C/T     | Unknown                           |
| <i>CAT</i>       | rs769214   | chr11:34459717  | A/G     | Near-gene-5                       |
| <i>CCL5</i>      | rs2280788  | chr17:34207405  | C/G     | Near-gene-5                       |
| <i>CD96</i>      | rs16858329 | chr3:111330061  | G/T     | Intron                            |
| <i>CDKAL1</i>    | rs4712523  | chr6:20657564   | A/G     | Intron                            |
| <i>CDKAL1</i>    | rs4712525  | chr6:20662966   | C/T     | Intron                            |
| <i>CDKAL1</i>    | rs6456368  | chr6:20659806   | C/T     | Intron                            |
| <i>CDKAL1</i>    | rs9460544  | chr6:20661529   | G/T     | Intron                            |
| <i>CDKN2BAS</i>  | rs10757278 | chr9:22124477   | A/G     | Unknown                           |
| <i>CDKN2BAS</i>  | rs1333049  | chr9:22125503   | C/G     | Unknown                           |
| <i>CETP</i>      | rs1566439  | chr16:57024662  | A/G     | Intron                            |
| <i>CETP</i>      | rs1800775  | chr16:56995236  | A/C     | Near-gene-5                       |
| <i>CILP2</i>     | rs16996148 | chr19:19658472  | G/T     | Unknown                           |
| <i>CILP2</i>     | rs17216525 | chr19:19662220  | C/T     | Unknown                           |
| <i>CNR1</i>      | rs806366   | chr6:88847589   | C/T     | Unknown                           |
| <i>CRP</i>       | rs1205     | chr1:159682233  | C/T     | Untranslated-3                    |
| <i>CRP</i>       | rs1417938  | chr1:159684186  | A/T     | Intron                            |
| <i>CRP</i>       | rs2027471  | chr1:159689388  | A/T     | Unknown                           |
| <i>CRP</i>       | rs2794520  | chr1:159678816  | C/T     | Unknown                           |
| <i>CRP</i>       | rs2808630  | chr1:159680868  | C/T     | Unknown                           |

|                |            |                 |         |                                     |
|----------------|------------|-----------------|---------|-------------------------------------|
| <i>CRP</i>     | rs3093058  | chr1:159685315  | A/T     | Near-gene-5                         |
| <i>CRP</i>     | rs3093066  | chr1:159683099  | A/C     | Intron,untranslated-3               |
| <i>CRP</i>     | rs3093075  | chr1:159679913  | A/C     | Unknown                             |
| <i>CRY2</i>    | rs11605924 | chr11:45873091  | A/C     | Intron                              |
| <i>CTBP2</i>   | rs1915146  | chr10:126846214 | C/T     | Intron                              |
| <i>CTBP2</i>   | rs7090538  | chr10:126828084 | C/T     | Intron                              |
| <i>CXCL12</i>  | rs169097   | chr10:44868083  | A/G     | Untranslated-3                      |
| <i>CYP1A1</i>  | rs1048943  | chr15:75012985  | A/C/G/T | Missense                            |
| <i>CYP1A1</i>  | rs2606345  | chr15:75017176  | A/C     | Intron                              |
| <i>CYP1A1</i>  | rs4646903  | chr15:75011641  | A/C/T   | Near-gene-3                         |
| <i>CYP1A2</i>  | rs11854147 | chr15:75052771  | C/T     | Unknown                             |
| <i>CYP1A2</i>  | rs2069514  | chr15:75038220  | A/G     | Unknown                             |
| <i>CYP1A2</i>  | rs2472299  | chr15:75033400  | A/G     | Unknown                             |
| <i>CYP1A2</i>  | rs4886406  | chr15:75057203  | A/C     | Unknown                             |
| <i>CYP1A2</i>  | rs762551   | chr15:75041917  | A/C     | Intron                              |
| <i>CYP1B1</i>  | rs1056836  | chr2:38298203   | C/G     | Unknown                             |
| <i>CYP1B1</i>  | rs1056837  | chr2:38298150   | A/C/T   | Coding-synon,missense               |
| <i>CYP1B1</i>  | rs162557   | chr2:38305451   | C/T     | Unknown                             |
| <i>CYP2A6</i>  | rs28399433 | chr19:41356379  | G/T     | Near-gene-5                         |
| <i>CYP2B6</i>  | rs2279343  | chr19:41515263  | A/G     | Intron,missense                     |
| <i>CYP2B6</i>  | rs3211371  | chr19:41522715  | C/T     | Near-gene-3,missense,untranslated-3 |
| <i>CYP2C19</i> | rs4986894  | chr10:96522365  | C/T     | Near-gene-5                         |
| <i>CYP2C9</i>  | rs1057910  | chr10:96741053  | A/C     | Missense                            |
| <i>CYP2E1</i>  | rs2031920  | chr10:135339845 | C/T     | Near-gene-5                         |
| <i>CYP2E1</i>  | rs6413432  | chr10:135348544 | A/T     | Intron                              |
| <i>CYP3A4</i>  | rs2740574  | chr7:99382096   | A/G     | Near-gene-5                         |
| <i>DLG2</i>    | rs1940098  | chr11:84391899  | A/G     | Intron                              |
| <i>DNER</i>    | rs6726280  | chr2:230493684  | A/C     | Intron                              |
| <i>DOCK7</i>   | rs10889353 | chr1:63118196   | A/C     | Intron                              |
| <i>DOCK7</i>   | rs1748195  | chr1:63049593   | C/G     | Intron,near-gene-3                  |
| <i>DPEP2</i>   | rs255052   | chr16:68024995  | A/G     | Intron                              |
| <i>EIF4E</i>   | rs11727086 | chr4:99828368   | A/G     | Intron                              |
| <i>ENPP1</i>   | rs6926728  | chr6:132174429  | C/G     | Intron                              |
| <i>ENPP1</i>   | rs7767502  | chr6:132174929  | C/G     | Intron                              |
| <i>FAAH</i>    | rs12029329 | chr1:46879856   | C/G     | Near-gene-3                         |
| <i>FABP2</i>   | rs1799883  | chr4:120241902  | A/C/G/T | Missense                            |
| <i>FADS1</i>   | rs174547   | chr11:61570783  | C/T     | Intron                              |
| <i>FADS1</i>   | rs174550   | chr11:61571478  | C/T     | Intron                              |
| <i>FAM155A</i> | rs744134   | chr13:108124321 | A/G     | Intron                              |
| <i>FARS2</i>   | rs9378968  | chr6:5581224    | A/G     | Intron                              |
| <i>FASTKD3</i> | rs1801394  | chr5:7870973    | A/G     | Near-gene-5,ncrna,missense          |

|                |            |                |         |                       |
|----------------|------------|----------------|---------|-----------------------|
| <i>FCER1A</i>  | rs2251746  | chr1:159272060 | C/T     | Intron                |
| <i>FCGR2A</i>  | rs1801274  | chr1:161479745 | C/T     | Missense              |
| <i>FGA</i>     | rs2070006  | chr4:155513866 | A/G     | Near-gene-5           |
| <i>FGA</i>     | rs2070008  | chr4:155513276 | A/G     | Near-gene-5           |
| <i>FGA</i>     | rs2070009  | chr4:155512941 | G/T     | Near-gene-5           |
| <i>FGA</i>     | rs2070011  | chr4:155511897 | A/G     | Untranslated-5        |
| <i>FGA</i>     | rs2070017  | chr4:155510276 | A/G     | Intron                |
| <i>FGA</i>     | rs2070022  | chr4:155504948 | C/T     | Untranslated-3        |
| <i>FGA</i>     | rs2070033  | chr4:155505291 | A/C/G/T | Coding-synon          |
| <i>FGA</i>     | rs6050     | chr4:155507590 | A/C/G/T | Missense              |
| <i>FGB</i>     | rs1800788  | chr4:155483914 | C/T     | Near-gene-5           |
| <i>FGB</i>     | rs1800790  | chr4:155483708 | A/G     | Near-gene-5           |
| <i>FGB</i>     | rs1800791  | chr4:155483309 | A/G     | Near-gene-5           |
| <i>FGB</i>     | rs2227395  | chr4:155484511 | A/G     | Intron                |
| <i>FGB</i>     | rs2227421  | chr4:155492224 | A/C     | Untranslated-3        |
| <i>FGB</i>     | rs4220     | chr4:155491759 | A/G     | Missense              |
| <i>FGB</i>     | rs6058     | chr4:155490344 | G/T     | Coding-synon          |
| <i>FGG</i>     | rs1049636  | chr4:155525970 | C/T     | Intron,untranslated-3 |
| <i>FGG</i>     | rs1800792  | chr4:155534408 | A/G     | Near-gene-5           |
| <i>FGG</i>     | rs2066861  | chr4:155527436 | A/G     | Intron                |
| <i>FRMD3</i>   | rs10868008 | chr9:86051269  | A/C     | Intron                |
| <i>FRMD3</i>   | rs11140077 | chr9:86039118  | A/G     | Intron                |
| <i>FRMD3</i>   | rs11140092 | chr9:86059732  | C/T     | Intron                |
| <i>FRY</i>     | rs12873155 | chr13:32711703 | C/T     | Intron                |
| <i>FRY</i>     | rs7331540  | chr13:32710520 | C/G     | Intron                |
| <i>FTO</i>     | rs3751812  | chr16:53818460 | G/T     | Intron                |
| <i>FTO</i>     | rs9935401  | chr16:53816838 | A/G     | Intron                |
| <i>G6PC2</i>   | rs560887   | chr2:169763148 | A/G     | Intron                |
| <i>GALNT2</i>  | rs2144300  | chr1:230294916 | C/T     | Intron                |
| <i>GALNT2</i>  | rs4846914  | chr1:230295691 | A/G     | Intron                |
| <i>GATAD2A</i> | rs3794991  | chr19:19610596 | C/T     | Intron                |
| <i>GCK</i>     | rs1799884  | chr7:44229068  | A/G     | Near-gene-5           |
| <i>GCK</i>     | rs2908289  | chr7:44223942  | C/T     | Intron                |
| <i>GCK</i>     | rs730497   | chr7:44223721  | C/T     | Intron                |
| <i>GCKR</i>    | rs1260326  | chr2:27730940  | C/T     | Missense              |
| <i>GCKR</i>    | rs780093   | chr2:27742603  | A/G     | Intron                |
| <i>GCKR</i>    | rs780094   | chr2:27741237  | A/G     | Intron                |
| <i>GHI</i>     | rs2854184  | chr17:61997993 | A/T     | Near-gene-5           |
| <i>GHI</i>     | rs7219235  | chr17:61996425 | A/G     | Near-gene-5           |
| <i>GIPR</i>    | rs10423928 | chr19:46182304 | A/T     | Intron                |
| <i>GIPR</i>    | rs1800437  | chr19:46181392 | C/G     | Missense              |

|               |            |                 |     |                       |
|---------------|------------|-----------------|-----|-----------------------|
| <i>GLIS3</i>  | rs7034200  | chr9:4289050    | A/C | Intron                |
| <i>GSDMB</i>  | rs7216389  | chr17:38069949  | C/T | Intron                |
| <i>HFE</i>    | rs1800562  | chr6:26093141   | A/G | Intron,ncrna,missense |
| <i>HFM1</i>   | rs10493846 | chr1:91785202   | G/T | Intron                |
| <i>HK1</i>    | rs16926246 | chr10:71093392  | C/T | Intron                |
| <i>HMGCR</i>  | rs12654264 | chr5:74648603   | A/T | Intron                |
| <i>HNF1B</i>  | rs757210   | chr17:36096515  | A/G | Intron                |
| <i>HNF4A</i>  | rs1800961  | chr20:43042364  | C/T | Missense              |
| <i>HNMT</i>   | rs3791244  | chr2:138731765  | C/T | Intron                |
| <i>HTR5A</i>  | rs1436818  | chr7:154885237  | A/G | Unknown               |
| <i>IFIT1B</i> | rs304502   | chr10:91137521  | C/T | Near-gene-5           |
| <i>IGF1</i>   | rs35767    | chr12:102875569 | C/T | Near-gene-5           |
| <i>IL10</i>   | rs1800871  | chr1:206946634  | C/T | Near-gene-5           |
| <i>IL10</i>   | rs1800872  | chr1:206946407  | A/C | Near-gene-5           |
| <i>IL10</i>   | rs1800896  | chr1:206946897  | A/G | Near-gene-5           |
| <i>IL13</i>   | rs1800925  | chr5:131992809  | C/T | Near-gene-5           |
| <i>IL13</i>   | rs20541    | chr5:131995964  | C/T | Missense              |
| <i>IL1B</i>   | rs1143623  | chr2:113595829  | C/G | Near-gene-5           |
| <i>IL1RL1</i> | rs1420101  | chr2:102957716  | A/G | Intron,ncrna          |
| <i>IL4</i>    | rs2243248  | chr5:132008644  | G/T | Near-gene-5           |
| <i>IL4</i>    | rs2243250  | chr5:132009154  | C/T | Near-gene-5           |
| <i>IL4</i>    | rs2243270  | chr5:132014109  | A/G | Intron                |
| <i>IL4R</i>   | rs1801275  | chr16:27374400  | A/G | Near-gene-3,missense  |
| <i>IL4R</i>   | rs1805015  | chr16:27374180  | C/T | Near-gene-3,missense  |
| <i>IL6</i>    | rs1800795  | chr7:22766645   | C/G | Near-gene-5           |
| <i>IL6R</i>   | rs2228145  | chr1:154426970  | A/C | Intron,missense       |
| <i>IL7R</i>   | rs7717955  | chr5:35862841   | C/T | Intron                |
| <i>IL7R</i>   | rs987106   | chr5:35875593   | A/T | Intron                |
| <i>ILF3</i>   | rs8102380  | chr19:10801185  | A/G | Untranslated-3        |
| <i>INS</i>    | rs689      | chr11:2182224   | A/T | Intron,untranslated-5 |
| <i>IRS1</i>   | rs3769647  | chr2:227659583  | C/G | Intron                |
| <i>IRS1</i>   | rs4675095  | chr2:227651967  | A/T | Intron                |
| <i>ITGA2</i>  | rs1126643  | chr5:52347369   | C/T | Coding-synon,ncrna    |
| <i>ITGAM</i>  | rs7193268  | chr16:31340997  | C/T | Intron                |
| <i>ITGAM</i>  | rs9933520  | chr16:31343386  | A/G | Untranslated-3        |
| <i>ITGB3</i>  | rs5918     | chr17:45360730  | C/T | Missense              |
| <i>ITPR2</i>  | rs11048606 | chr12:26756606  | C/G | Intron                |
| <i>JAZF1</i>  | rs864745   | chr7:28180556   | A/G | Intron                |
| <i>KCNMA1</i> | rs10509384 | chr10:79023182  | A/G | Intron                |
| <i>KCNQ1</i>  | rs2074196  | chr11:2824800   | G/T | Intron                |
| <i>KCNQ1</i>  | rs2237895  | chr11:2857194   | A/C | Intron                |

|                |            |                 |     |                            |
|----------------|------------|-----------------|-----|----------------------------|
| <i>KCNQ3</i>   | rs4736583  | chr8:133441144  | A/C | Intron                     |
| <i>KCTD10</i>  | rs2338104  | chr12:109895168 | C/G | Intron                     |
| <i>KCTD17</i>  | rs855791   | chr22:37462936  | C/T | Missense                   |
| <i>KLF7</i>    | rs6743779  | chr2:207990038  | A/C | Intron                     |
| <i>LDHA</i>    | rs10832934 | chr11:18435700  | C/T | Intron                     |
| <i>LDHA</i>    | rs11024649 | chr11:18438330  | C/T | Intron                     |
| <i>LDHA</i>    | rs11601413 | chr11:18421683  | A/C | Intron                     |
| <i>LDHA</i>    | rs2403279  | chr11:18416615  | A/C | Intron,near-gene-5         |
| <i>LDHA</i>    | rs2896526  | chr11:18419806  | A/G | Intron                     |
| <i>LDHAL6A</i> | rs1881717  | chr11:18472133  | A/G | Intron                     |
| <i>LDHB</i>    | rs12319089 | chr12:21802055  | A/G | Intron                     |
| <i>LDHC</i>    | rs2037868  | chr11:18439212  | C/T | Intron                     |
| <i>LDHC</i>    | rs2721126  | chr11:18456181  | C/T | Intron                     |
| <i>LDHC</i>    | rs7938942  | chr11:18466247  | C/T | Intron                     |
| <i>LDLR</i>    | rs10409044 | chr19:11242974  | C/G | Untranslated-3             |
| <i>LDLR</i>    | rs10423288 | chr19:11215846  | C/T | Intron                     |
| <i>LDLR</i>    | rs1433099  | chr19:11242658  | A/G | Untranslated-3             |
| <i>LDLR</i>    | rs17242346 | chr19:11198780  | A/G | Near-gene-5                |
| <i>LDLR</i>    | rs17242739 | chr19:11198683  | A/C | Near-gene-5                |
| <i>LDLR</i>    | rs17248720 | chr19:11198187  | C/T | Near-gene-5                |
| <i>LDLR</i>    | rs17249330 | chr19:11234327  | C/T | Intron                     |
| <i>LDLR</i>    | rs2228671  | chr19:11210912  | C/T | Coding-synon,ncrna         |
| <i>LDLR</i>    | rs2569540  | chr19:11238239  | C/G | Intron                     |
| <i>LDLR</i>    | rs2569559  | chr19:11214533  | A/C | Intron                     |
| <i>LDLR</i>    | rs2738450  | chr19:11228965  | A/C | Intron                     |
| <i>LDLR</i>    | rs2738464  | chr19:11242307  | C/G | Untranslated-3             |
| <i>LDLR</i>    | rs2738465  | chr19:11242496  | A/G | Untranslated-3             |
| <i>LDLR</i>    | rs5925     | chr19:11230881  | C/T | Coding-synon,ncrna         |
| <i>LDLR</i>    | rs5927     | chr19:11233941  | A/G | Coding-synon,ncrna         |
| <i>LDLR</i>    | rs5929     | chr19:11226800  | C/T | Coding-synon,ncrna         |
| <i>LDLR</i>    | rs6413504  | chr19:11241915  | A/G | Intron                     |
| <i>LDLR</i>    | rs6511720  | chr19:11202306  | G/T | Intron                     |
| <i>LDLR</i>    | rs6511721  | chr19:11206575  | A/G | Intron                     |
| <i>LDLR</i>    | rs8102912  | chr19:11205975  | A/G | Intron                     |
| <i>LIPC</i>    | rs1800588  | chr15:58723675  | C/T | Intron,near-gene-5         |
| <i>LIPG</i>    | rs2000812  | chr18:47093790  | C/T | Intron                     |
| <i>LIPG</i>    | rs3829632  | chr18:47087118  | C/T | Near-gene-5,untranslated-5 |
| <i>LPA</i>     | rs10945682 | chr6:161069941  | A/G | Intron                     |
| <i>LPA</i>     | rs12194138 | chr6:160959831  | A/T | Intron                     |
| <i>LPA</i>     | rs13192132 | chr6:161022423  | C/T | Intron                     |
| <i>LPA</i>     | rs1321195  | chr6:161084156  | C/T | Intron                     |

|                 |            |                |     |                             |
|-----------------|------------|----------------|-----|-----------------------------|
| <i>LPA</i>      | rs1321196  | chr6:161081842 | A/G | Intron                      |
| <i>LPA</i>      | rs1367211  | chr6:161082695 | A/G | Intron                      |
| <i>LPA</i>      | rs1652507  | chr6:161082461 | A/G | Intron                      |
| <i>LPA</i>      | rs4073498  | chr6:161008645 | C/T | Intron                      |
| <i>LPA</i>      | rs6907156  | chr6:161016009 | C/T | Intron                      |
| <i>LPA</i>      | rs6919346  | chr6:160960359 | C/T | Intron                      |
| <i>LPA</i>      | rs6926458  | chr6:161019866 | A/G | Intron                      |
| <i>LPA</i>      | rs7450411  | chr6:161010354 | A/C | Intron                      |
| <i>LPA</i>      | rs7755463  | chr6:161012270 | C/T | Intron                      |
| <i>LPA</i>      | rs7765803  | chr6:161007538 | C/G | Missense                    |
| <i>LPA</i>      | rs7767084  | chr6:160962503 | C/T | Intron                      |
| <i>LPA</i>      | rs9364564  | chr6:160999040 | A/G | Intron                      |
| <i>LPL</i>      | rs2197089  | chr8:19826373  | C/T | Unknown                     |
| <i>LPL</i>      | rs328      | chr8:19819724  | C/G | Nonsense                    |
| <i>LRP1B</i>    | rs16847412 | chr2:142618914 | C/T | Intron                      |
| <i>LRP5</i>     | rs3736228  | chr11:68201295 | C/T | Missense                    |
| <i>MADD</i>     | rs7944584  | chr11:47336320 | A/T | Intron                      |
| <i>MBL2</i>     | rs11003125 | chr10:54532014 | C/G | Intron,near-gene-5          |
| <i>MBL2</i>     | rs1800450  | chr10:54531235 | A/G | Missense                    |
| <i>MBL2</i>     | rs1800451  | chr10:54531226 | A/G | Missense                    |
| <i>MBL2</i>     | rs5030737  | chr10:54531242 | C/T | Missense                    |
| <i>MBL2</i>     | rs7096206  | chr10:54531685 | C/G | Intron,near-gene-5          |
| <i>MBOAT1</i>   | rs1202209  | chr6:20180235  | G/T | Intron                      |
| <i>MBOAT1</i>   | rs1202210  | chr6:20180786  | C/T | Intron                      |
| <i>MIR548A2</i> | rs4607103  | chr3:64711904  | C/T | Intron                      |
| <i>MSRA</i>     | rs9329221  | chr8:10240202  | G/T | Intron                      |
| <i>MTCH2</i>    | rs10838738 | chr11:47663049 | A/G | Intron                      |
| <i>MTHFR</i>    | rs1801131  | chr1:11854476  | A/C | Missense                    |
| <i>MTHFR</i>    | rs1801133  | chr1:11856378  | C/T | Missense                    |
| <i>MTHFR</i>    | rs2066470  | chr1:11863057  | C/T | Coding-synon,untranslated-5 |
| <i>MTNR1B</i>   | rs10830963 | chr11:92708710 | C/G | Intron                      |
| <i>NAT2</i>     | rs1041983  | chr8:18257795  | C/T | Coding-synon                |
| <i>NAT2</i>     | rs1208     | chr8:18258316  | A/G | Missense                    |
| <i>NAT2</i>     | rs1799930  | chr8:18258103  | A/G | Missense                    |
| <i>NAT2</i>     | rs1799931  | chr8:18258370  | A/G | Missense                    |
| <i>NAT2</i>     | rs1801279  | chr8:18257704  | A/G | Missense                    |
| <i>NAT2</i>     | rs1801280  | chr8:18257854  | C/T | Missense                    |
| <i>NCAN</i>     | rs2238675  | chr19:19336608 | C/T | Intron                      |
| <i>NOS2</i>     | rs1800482  | chr17:26128509 | C/G | Near-gene-5                 |
| <i>NOS2</i>     | rs9282799  | chr17:26128728 | C/T | Near-gene-5                 |
| <i>NOS3</i>     | rs1799983  | chr7:150696111 | G/T | Missense                    |



|                 |            |                |     |                       |
|-----------------|------------|----------------|-----|-----------------------|
| <i>NOS3</i>     | rs2070744  | chr7:150690079 | C/T | Intron,near-gene-5    |
| <i>NOTCH2</i>   | rs10923931 | chr1:120517959 | G/T | Intron                |
| <i>NQO1</i>     | rs10517    | chr16:69743760 | C/T | Untranslated-3        |
| <i>NQO1</i>     | rs1800566  | chr16:69745145 | C/T | Missense              |
| <i>NQO1</i>     | rs689452   | chr16:69752464 | C/G | Intron                |
| <i>NQO1</i>     | rs689453   | chr16:69752373 | A/G | Coding-synon          |
| <i>NUTF2</i>    | rs2271293  | chr16:67902070 | A/G | Intron                |
| <i>OAZ1</i>     | rs12985777 | chr19:2268055  | C/T | Near-gene-5           |
| <i>OAZ1</i>     | rs2523177  | chr19:2274578  | C/T | Near-gene-3           |
| <i>ORMDL3</i>   | rs12603332 | chr17:38082807 | C/T | Intron,near-gene-5    |
| <i>ORMDL3</i>   | rs4065275  | chr17:38080865 | A/G | Intron                |
| <i>ORMDL3</i>   | rs8076131  | chr17:38080912 | A/G | Intron                |
| <i>PCIF1</i>    | rs7679     | chr20:44576502 | C/T | Intron,untranslated-3 |
| <i>PCSK9</i>    | rs11206510 | chr1:55496039  | C/T | Unknown               |
| <i>PDP1</i>     | rs4735258  | chr8:94935937  | C/T | Untranslated-3        |
| <i>PDP1</i>     | rs7814312  | chr8:94931872  | A/G | Intron,near-gene-5    |
| <i>PLXNA2</i>   | rs17187140 | chr1:208309775 | A/G | Intron                |
| <i>PLXNA2</i>   | rs17259332 | chr1:208295783 | A/T | Intron                |
| <i>PNPLA3</i>   | rs2281135  | chr22:44332570 | C/T | Intron                |
| <i>PNPLA3</i>   | rs738409   | chr22:44324727 | C/G | Ncrna,missense        |
| <i>PON1</i>     | rs662      | chr7:94937446  | A/G | Missense              |
| <i>PON1</i>     | rs854560   | chr7:94946084  | A/T | Coding-synon,missense |
| <i>PPARG</i>    | rs1801282  | chr3:12393125  | C/G | Intron,missense       |
| <i>PPP3R2</i>   | rs1323432  | chr9:104362937 | C/T | Intron                |
| <i>PREX1</i>    | rs6125463  | chr20:47389100 | A/G | Intron                |
| <i>PSRC1</i>    | rs12740374 | chr1:109817590 | G/T | Untranslated-3        |
| <i>PSRC1</i>    | rs646776   | chr1:109818530 | A/G | Near-gene-3           |
| <i>PTPDC1</i>   | rs6479526  | chr9:96830635  | C/T | Intron                |
| <i>QTRT1</i>    | rs2010492  | chr19:10803395 | C/T | Near-gene-3           |
| <i>RAB11B</i>   | rs2967605  | chr19:8469738  | A/G | Intron                |
| <i>RYR3</i>     | rs2676034  | chr15:33653543 | A/G | Intron                |
| <i>SERPINE1</i> | rs1799762  | chr7:100769707 | -/G | Unknown               |
| <i>SF4</i>      | rs10401969 | chr19:19407718 | C/T | Intron                |
| <i>SH2B1</i>    | rs7498665  | chr16:28883241 | A/G | Missense              |
| <i>SLC12A3</i>  | rs12596776 | chr16:56919348 | C/G | Intron                |
| <i>SLC12A4</i>  | rs3785100  | chr16:67997920 | C/T | Intron,missense       |
| <i>SLC2A2</i>   | rs11920090 | chr3:170717521 | A/T | Intron                |
| <i>SLC2A9</i>   | rs6855911  | chr4:9935910   | A/G | Intron                |
| <i>SLC2A9</i>   | rs7442295  | chr4:9966380   | A/G | Intron                |
| <i>SLC30A8</i>  | rs11558471 | chr8:118185733 | A/G | Untranslated-3        |
| <i>SLC30A8</i>  | rs13266634 | chr8:118184783 | C/T | Missense              |

|                |            |                 |     |                                   |
|----------------|------------|-----------------|-----|-----------------------------------|
| <i>SLC6A17</i> | rs2011688  | chr1:110729404  | C/T | Intron                            |
| <i>SMARCA4</i> | rs1529729  | chr19:11163562  | A/G | Intron                            |
| <i>SORBS2</i>  | rs2101307  | chr4:186526185  | A/G | Intron                            |
| <i>SPATA17</i> | rs10495066 | chr1:217837425  | A/G | Intron                            |
| <i>STK3</i>    | rs12545656 | chr8:99479712   | A/G | Intron                            |
| <i>SUOX</i>    | rs7297662  | chr12:56395378  | A/G | Intron                            |
| <i>SYNE2</i>   | rs8007972  | chr14:64564527  | C/T | Intron                            |
| <i>TBL2</i>    | rs17145738 | chr7:72982874   | C/T | Near-gene-3                       |
| <i>TCF7L2</i>  | rs12243326 | chr10:114788815 | C/T | Intron                            |
| <i>TCF7L2</i>  | rs4506565  | chr10:114756041 | A/T | Intron                            |
| <i>TCF7L2</i>  | rs7089262  | chr10:114893489 | C/T | Intron                            |
| <i>THADA</i>   | rs7578597  | chr2:43732823   | C/T | Ncrna,missense                    |
| <i>TIMD4</i>   | rs1501908  | chr5:156398169  | C/G | Unknown                           |
| <i>TLR4</i>    | rs4986790  | chr9:120475302  | A/G | Missense                          |
| <i>TMPRSS6</i> | rs2235323  | chr22:37485193  | C/T | Intron                            |
| <i>TMPRSS6</i> | rs2235324  | chr22:37485724  | C/T | Missense                          |
| <i>TNF</i>     | rs1800629  | chr6:31543030   | A/G | Near-gene-5                       |
| <i>TNF</i>     | rs1800750  | chr6:31542962   | A/G | Near-gene-5                       |
| <i>TNF</i>     | rs361525   | chr6:31543100   | A/G | Near-gene-5                       |
| <i>TRIOBP</i>  | rs4821698  | chr22:38115318  | C/T | Intron                            |
| <i>TRIOBP</i>  | rs762982   | chr22:38144235  | C/T | Intron                            |
| <i>TRPM3</i>   | rs541326   | chr9:73706951   | C/T | Intron                            |
| <i>TRPM3</i>   | rs688933   | chr9:73673159   | A/G | Intron                            |
| <i>TRPV3</i>   | rs11078458 | chr17:3445901   | G/T | Coding-synon                      |
| <i>TSLP</i>    | rs1898671  | chr5:110408002  | C/T | Intron,near-gene-5                |
| <i>TSLP</i>    | rs2289276  | chr5:110407507  | C/T | Intron,near-gene-5,untranslated-5 |
| <i>TTC32</i>   | rs2278528  | chr2:20101832   | C/G | Near-gene-5                       |
| <i>TTC39B</i>  | rs471364   | chr9:15289578   | A/G | Intron                            |
| <i>UMOD</i>    | rs13335818 | chr16:20359831  | C/T | Coding-synon                      |
| <i>UMOD</i>    | rs4293393  | chr16:20364588  | C/T | Near-gene-5                       |
| <i>Unknown</i> | rs10503669 | chr8:19847690   | A/C | Unknown                           |
| <i>Unknown</i> | rs10778213 | chr12:103495151 | C/T | Unknown                           |
| <i>Unknown</i> | rs10938397 | chr4:45182527   | A/G | Unknown                           |
| <i>Unknown</i> | rs11265260 | chr1:159700039  | A/G | Unknown                           |
| <i>Unknown</i> | rs12093699 | chr1:159647988  | A/G | Unknown                           |
| <i>Unknown</i> | rs12130333 | chr1:63191777   | C/T | Unknown                           |
| <i>Unknown</i> | rs12678919 | chr8:19844222   | A/G | Unknown                           |
| <i>Unknown</i> | rs12744244 | chr1:159647656  | A/C | Unknown                           |
| <i>Unknown</i> | rs1365032  | chr8:75553100   | A/G | Intron                            |
| <i>Unknown</i> | rs1555173  | chr6:85064458   | A/G | Unknown                           |
| <i>Unknown</i> | rs17321515 | chr8:126486409  | A/G | Unknown                           |

|                |            |                 |         |              |
|----------------|------------|-----------------|---------|--------------|
| <i>Unknown</i> | rs17782313 | chr18:57851097  | C/T     | Unknown      |
| <i>Unknown</i> | rs2156552  | chr18:47181668  | A/T     | Unknown      |
| <i>Unknown</i> | rs2383208  | chr9:22132076   | A/G     | Unknown      |
| <i>Unknown</i> | rs2568958  | chr1:72765116   | A/G     | Unknown      |
| <i>Unknown</i> | rs2592887  | chr1:159652939  | A/G     | Unknown      |
| <i>Unknown</i> | rs2650000  | chr12:121388962 | G/T     | Unknown      |
| <i>Unknown</i> | rs287354   | chr13:69239952  | C/T     | Unknown      |
| <i>Unknown</i> | rs2954029  | chr8:126490972  | A/T     | Unknown      |
| <i>Unknown</i> | rs4355801  | chr8:119923873  | A/G     | Unknown      |
| <i>Unknown</i> | rs4939883  | chr18:47167214  | C/T     | Unknown      |
| <i>Unknown</i> | rs515135   | chr2:21286057   | A/G     | Unknown      |
| <i>Unknown</i> | rs562338   | chr2:21288321   | C/T     | Unknown      |
| <i>Unknown</i> | rs6548238  | chr2:634905     | C/T     | Unknown      |
| <i>Unknown</i> | rs6586891  | chr8:19914598   | A/C     | Unknown      |
| <i>Unknown</i> | rs6854883  | chr4:111607315  | C/T     | Unknown      |
| <i>Unknown</i> | rs7557067  | chr2:21208211   | A/G     | Unknown      |
| <i>Unknown</i> | rs7566605  | chr2:118836025  | C/G     | Unknown      |
| <i>Unknown</i> | rs890945   | chr5:157992223  | A/T     | Unknown      |
| <i>Unknown</i> | rs966376   | chr18:28832838  | A/G     | Unknown      |
| <i>Unknown</i> | rs9859609  | chr3:176259577  | A/G     | Unknown      |
| <i>USP1</i>    | rs636523   | chr1:62920008   | C/T     | Near-gene-3  |
| <i>VDR</i>     | rs2239185  | chr12:48244559  | C/T     | Intron       |
| <i>VDR</i>     | rs731236   | chr12:48238757  | A/C/G/T | Coding-synon |
| <i>VLDLR</i>   | rs10757603 | chr9:2636520    | G/T     | Intron       |
| <i>VLDLR</i>   | rs10812377 | chr9:2633396    | C/G     | Intron       |
| <i>VLDLR</i>   | rs10812379 | chr9:2633548    | C/T     | Intron       |
| <i>VLDLR</i>   | rs10812381 | chr9:2634646    | A/T     | Intron       |
| <i>VLDLR</i>   | rs10967213 | chr9:2625172    | G/T     | Intron       |
| <i>VLDLR</i>   | rs10967217 | chr9:2626977    | C/G     | Intron       |
| <i>VLDLR</i>   | rs10967228 | chr9:2629324    | C/T     | Intron       |
| <i>VLDLR</i>   | rs12336893 | chr9:2632365    | G/T     | Intron       |
| <i>VLDLR</i>   | rs12336931 | chr9:2632447    | C/T     | Intron       |
| <i>VLDLR</i>   | rs12379867 | chr9:2627954    | C/G     | Intron       |
| <i>VLDLR</i>   | rs12551418 | chr9:2627365    | A/T     | Intron       |
| <i>VLDLR</i>   | rs13290598 | chr9:2624433    | A/G     | Intron       |
| <i>VLDLR</i>   | rs1454626  | chr9:2621030    | A/C     | Near-gene-5  |
| <i>VLDLR</i>   | rs1454627  | chr9:2631738    | A/G     | Intron       |
| <i>VLDLR</i>   | rs1545565  | chr9:2624874    | C/T     | Intron       |
| <i>VLDLR</i>   | rs1545567  | chr9:2626260    | C/T     | Intron       |
| <i>VLDLR</i>   | rs1551411  | chr9:2631932    | C/T     | Intron       |
| <i>VLDLR</i>   | rs1869592  | chr9:2632250    | A/C     | Intron       |

|               |            |                |     |                |
|---------------|------------|----------------|-----|----------------|
| <i>VLDLR</i>  | rs2242104  | chr9:2640492   | A/G | Intron         |
| <i>VLDLR</i>  | rs2290465  | chr9:2645201   | C/G | Intron         |
| <i>VLDLR</i>  | rs28439743 | chr9:2624276   | C/T | Intron         |
| <i>VLDLR</i>  | rs28669967 | chr9:2626916   | C/G | Intron         |
| <i>VLDLR</i>  | rs33955077 | chr9:2626703   | G/T | Intron         |
| <i>VLDLR</i>  | rs33967773 | chr9:2638113   | C/T | Intron         |
| <i>VLDLR</i>  | rs34156497 | chr9:2639533   | A/G | Intron         |
| <i>VLDLR</i>  | rs34745933 | chr9:2653719   | C/T | Intron         |
| <i>VLDLR</i>  | rs35075133 | chr9:2652589   | C/T | Intron         |
| <i>VLDLR</i>  | rs35136375 | chr9:2628433   | A/T | Intron         |
| <i>VLDLR</i>  | rs35466361 | chr9:2641107   | A/T | Intron         |
| <i>VLDLR</i>  | rs35775773 | chr9:2620274   | G/T | Near-gene-5    |
| <i>VLDLR</i>  | rs35782329 | chr9:2643832   | C/T | Intron         |
| <i>VLDLR</i>  | rs35840674 | chr9:2620346   | A/C | Near-gene-5    |
| <i>VLDLR</i>  | rs4741748  | chr9:2626851   | A/G | Intron         |
| <i>VLDLR</i>  | rs6144     | chr9:2645557   | A/T | Intron         |
| <i>VLDLR</i>  | rs6145     | chr9:2651962   | G/T | Intron         |
| <i>VLDLR</i>  | rs6148     | chr9:2648773   | A/G | Coding-synon   |
| <i>VLDLR</i>  | rs6149     | chr9:2635545   | A/G | Missense       |
| <i>VLDLR</i>  | rs6475888  | chr9:2647760   | A/G | Intron         |
| <i>VLDLR</i>  | rs7022086  | chr9:2624104   | A/T | Intron         |
| <i>VLDLR</i>  | rs7024888  | chr9:2636992   | C/T | Intron         |
| <i>VLDLR</i>  | rs7027942  | chr9:2629776   | A/G | Intron         |
| <i>VLDLR</i>  | rs7030221  | chr9:2635116   | C/G | Intron         |
| <i>VLDLR</i>  | rs7035616  | chr9:2636161   | C/T | Intron         |
| <i>VLDLR</i>  | rs7043836  | chr9:2651714   | G/T | Intron         |
| <i>VLDLR</i>  | rs7043949  | chr9:2651809   | C/T | Intron         |
| <i>VLDLR</i>  | rs7860109  | chr9:2623698   | A/G | Intron         |
| <i>VLDLR</i>  | rs7863951  | chr9:2644874   | C/T | Intron         |
| <i>VLDLR</i>  | rs8210     | chr9:2654419   | C/T | Untranslated-3 |
| <i>VPS13C</i> | rs17271305 | chr15:62332980 | A/G | Intron         |
| <i>VPS13C</i> | rs17271340 | chr15:62347885 | C/T | Intron         |
| <i>WFS1</i>   | rs10012946 | chr4:6293350   | C/T | Intron         |
| <i>WFS1</i>   | rs5018648  | chr4:6292818   | C/G | Intron         |
| <i>WWOX</i>   | rs2667590  | chr16:78531037 | C/G | Intron         |
| <i>XKR6</i>   | rs11990550 | chr8:10797831  | A/G | Intron         |
| <i>XRCC1</i>  | rs1001581  | chr19:44065388 | C/T | Intron         |
| <i>XRCC1</i>  | rs1799782  | chr19:44057574 | C/T | Missense       |
| <i>XRCC1</i>  | rs25486    | chr19:44055898 | A/G | Intron         |
| <i>XRCC1</i>  | rs25487    | chr19:44055726 | A/G | Missense       |
| <i>XRCC1</i>  | rs25489    | chr19:44056412 | A/G | Missense       |

|               |            |                 |     |        |
|---------------|------------|-----------------|-----|--------|
| <i>XRCC5</i>  | rs828704   | chr2:216993611  | A/C | Intron |
| <i>YKT6</i>   | rs2908282  | chr7:44248828   | C/T | Intron |
| <i>YKT6</i>   | rs917793   | chr7:44245853   | A/T | Intron |
| <i>ZNF259</i> | rs12286037 | chr11:116652207 | C/T | Intron |
| <i>ZNF259</i> | rs964184   | chr11:116648917 | C/G | Intron |

<sup>a</sup> Official gene symbols are from the HUGO Gene Nomenclature Committee (<http://www.genenames.org>).

<sup>b</sup> Unique reference SNP identifier in the Entrez SNP database at the National Center for Biotechnology information (<http://www.ncbi.nlm.nih.gov/projects/SNP/>).

eTable 2. List of 267 SNPs from the NHANES III genetic dataset used for genomic control

|             |              |             |           |           |           |           |
|-------------|--------------|-------------|-----------|-----------|-----------|-----------|
| rs10007810  | rs12046278   | rs16982520  | rs2121070 | rs3096277 | rs4949333 | rs769214  |
| rs10020773  | rs1208       | rs16988126  | rs2125345 | rs309795  | rs4951629 | rs7745461 |
| rs10037968  | rs12140698_A | rs16998073  | rs2162987 | rs3118378 | rs4968401 | rs775421  |
| rs10208402  | rs12190789   | rs16998203  | rs2191349 | rs313758  | rs536706  | rs7781370 |
| rs1045642   | rs12242066   | rs17026635  | rs226062  | rs314279  | rs554339  | rs7844723 |
| rs1046896   | rs12319089   | rs17112401  | rs2273061 | rs316873  | rs574174  | rs7861175 |
| rs10488172  | rs12374129   | rs17215067  | rs2280788 | rs322707  | rs5747079 | rs7867013 |
| rs10490072  | rs1243400    | rs17319721  | rs2330442 | rs32314   | rs6025    | rs7958130 |
| rs10500351  | rs12451501   | rs17356585  | rs2378383 | rs340406  | rs6069670 | rs7961581 |
| rs10501920  | rs12469114   | rs1741662   | rs2384550 | rs340874  | rs6101193 | rs8004654 |
| rs10502635  | rs12592342   | rs17429652  | rs2397060 | rs342293  | rs6265    | rs8021730 |
| rs10502868  | rs12618178   | rs17486127  | rs2398162 | rs3766680 | rs6456218 | rs8034191 |
| rs10507380  | rs12712739   | rs17558056  | rs2441965 | rs3773643 | rs6471201 | rs8068838 |
| rs10511828  | rs12815715   | rs17698672  | rs2461751 | rs3793427 | rs647316  | rs8084399 |
| rs10513300  | rs12946454   | rs17714854  | rs2467853 | rs3811647 | rs6474359 | rs818386  |
| rs10514688  | rs13147758   | rs17764256  | rs2479927 | rs3865253 | rs653178  | rs828704  |
| rs10516115  | rs1360414    | rs1799864   | rs2504853 | rs3867498 | rs6593296 | rs8756    |
| rs10521232  | rs1366594    | rs1799983   | rs2523107 | rs3889228 | rs6602024 | rs87938   |
| rs1052133   | rs1367248    | rs1800435   | rs25681   | rs3914132 | rs662     | rs881728  |
| rs1057910   | rs1371924    | rs1800451   | rs2588625 | rs3939286 | rs6673413 | rs882300  |
| rs1061170   | rs1379659    | rs1800482   | rs2588789 | rs4273136 | rs6711736 | rs899547  |
| rs10783197  | rs1407434    | rs1800497   | rs260690  | rs4370013 | rs686     | rs9305354 |
| rs10822108  | rs1408801    | rs1800629   | rs2627037 | rs4402960 | rs689453  | rs9341062 |
| rs10842994  | rs1416802    | rs1800871   | rs2681492 | rs4457053 | rs6947696 | rs9375249 |
| rs10885122  | rs1442099    | rs1801282_B | rs2702414 | rs4512366 | rs7042864 | rs9379116 |
| rs11016132  | rs1471939    | rs1805010   | rs2740574 | rs452421  | rs7132980 | rs9472138 |
| rs11084753  | rs1476609    | rs1805128   | rs2741856 | rs4552542 | rs7188697 | rs9494145 |
| rs11118259  | rs1503767    | rs1862370   | rs2812219 | rs4586907 | rs7238445 | rs9498115 |
| rs1111875_B | rs1530440    | rs1871428   | rs2814993 | rs4666200 | rs724016  | rs950828  |
| rs11163470  | rs1552224    | rs1940653   | rs2820037 | rs4742455 | rs7333181 | rs9587059 |
| rs11191548  | rs1621902    | rs1953743   | rs282606  | rs4746136 | rs7512898 | rs9599802 |
| rs11241892  | rs162557     | rs1955086   | rs2835370 | rs475749  | rs755114  | rs9845457 |
| rs1126643   | rs1668873    | rs1963982   | rs2837232 | rs4770584 | rs7554936 | rs9917851 |
| rs1143623   | rs16902507   | rs2008242   | rs2838815 | rs4800105 | rs7585796 |           |
| rs1153188   | rs169097     | rs2033111   | rs2866056 | rs4811011 | rs7586834 |           |
| rs11646213  | rs16931326   | rs2070469   | rs2887172 | rs4817276 | rs7591163 |           |
| rs11743511  | rs1693669    | rs210135    | rs2946788 | rs4884605 | rs7593730 |           |
| rs11928865  | rs16948048   | rs210135    | rs2991497 | rs4891590 | rs7604361 |           |

eTable 3. Power calculations for associations of genetic variants *APOA4* rs5110 and *APOE* rs7412 among the three racial/ethnic groups.

| Gene         | Variant | Power (%) <sup>a</sup> |                     |                   |
|--------------|---------|------------------------|---------------------|-------------------|
|              |         | Non-Hispanic whites    | Non-Hispanic blacks | Mexican Americans |
| <i>APOA4</i> | rs5110  | 0.99                   | 0.73                | 0.99              |
| <i>APOE</i>  | rs7412  | 0.97                   | 0.91                | 0.60              |

<sup>a</sup>Power was calculated based on an additive genetic model, design effect of 1.3 to accommodate the complex survey design of NHANES III, anti-HEV prevalence for each race/ethnicity group as population disease risk, 0.05 significance level, and observed genetic effect size (odds ratio) from non-Hispanic blacks (Table 2) for each variant in each race/ethnicity group. POWER procedure in SAS 9.3 was used.

eFigure 1. Quantile-quantile plots of  $P$  value ( $-\log$ ) for associations of between SNPs in candidate genes with seropositivity of anti-HEV in univariable model

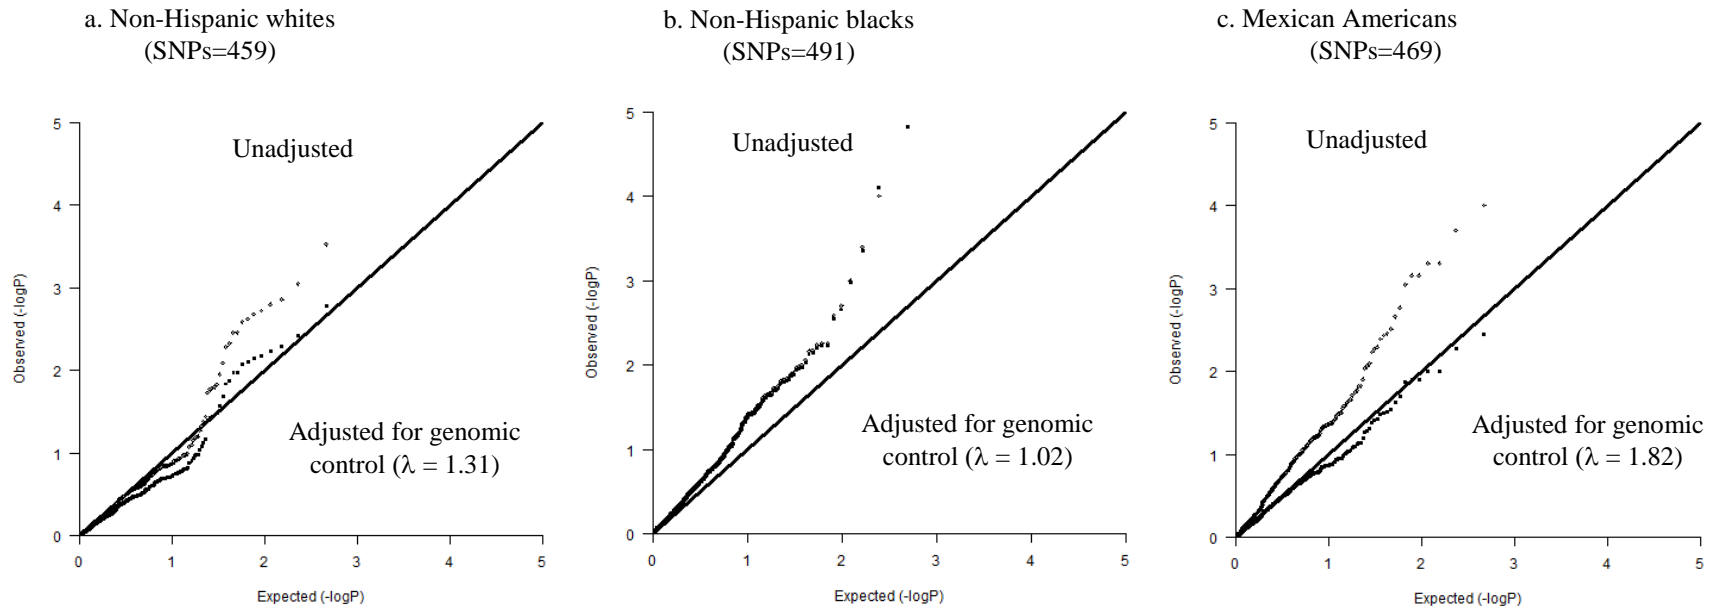

Supplement: NIHMS1043972-supplement-Supplemental.pdf [file NIHMS1043972-supplement-Supplemental.pdf]
